# Supplementary material
Source: PubMed Central journal article supplement (PMC6309345)
Supplement: NIHMS1508507-supplement-Graphic_Abstract.pdf [file NIHMS1508507-supplement-Graphic_Abstract.pdf]

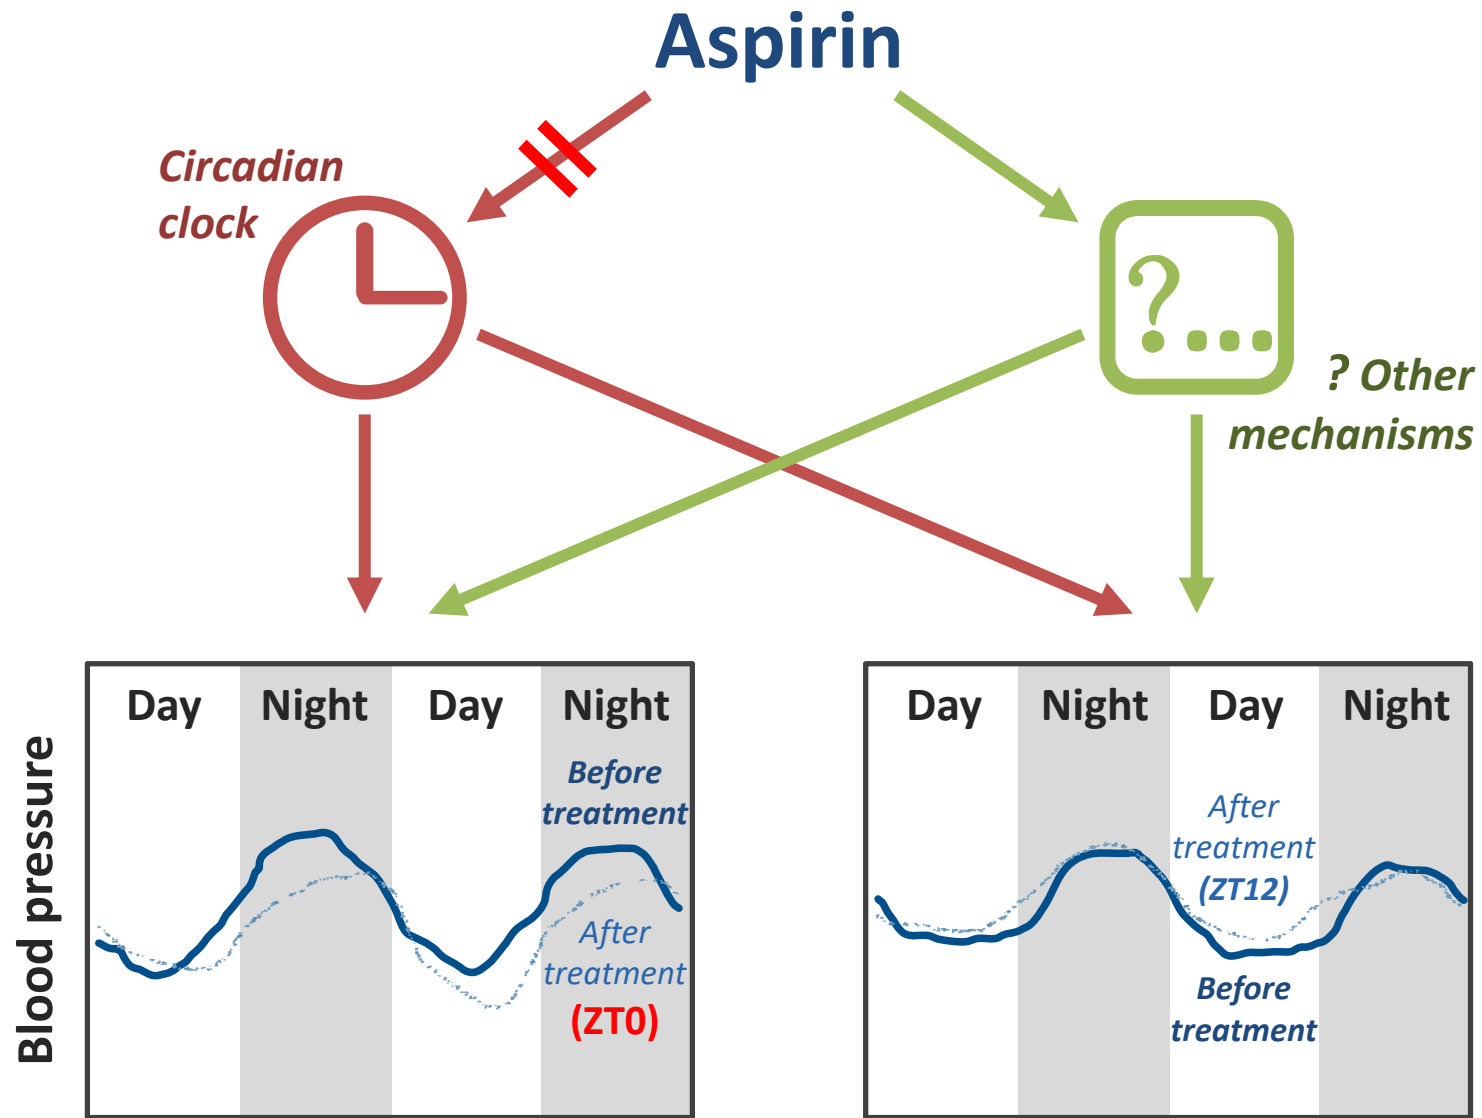

The time dependent hypotensive effect of aspirin does not appear to reflect a direct impact on circadian clocks
