# Supplementary material
Source: PubMed Central journal article supplement (PMC6309345)
Supplement: NIHMS1508507-supplement-Supplemental_Material.pdf [file NIHMS1508507-supplement-Supplemental_Material.pdf]

# Supplemental Material

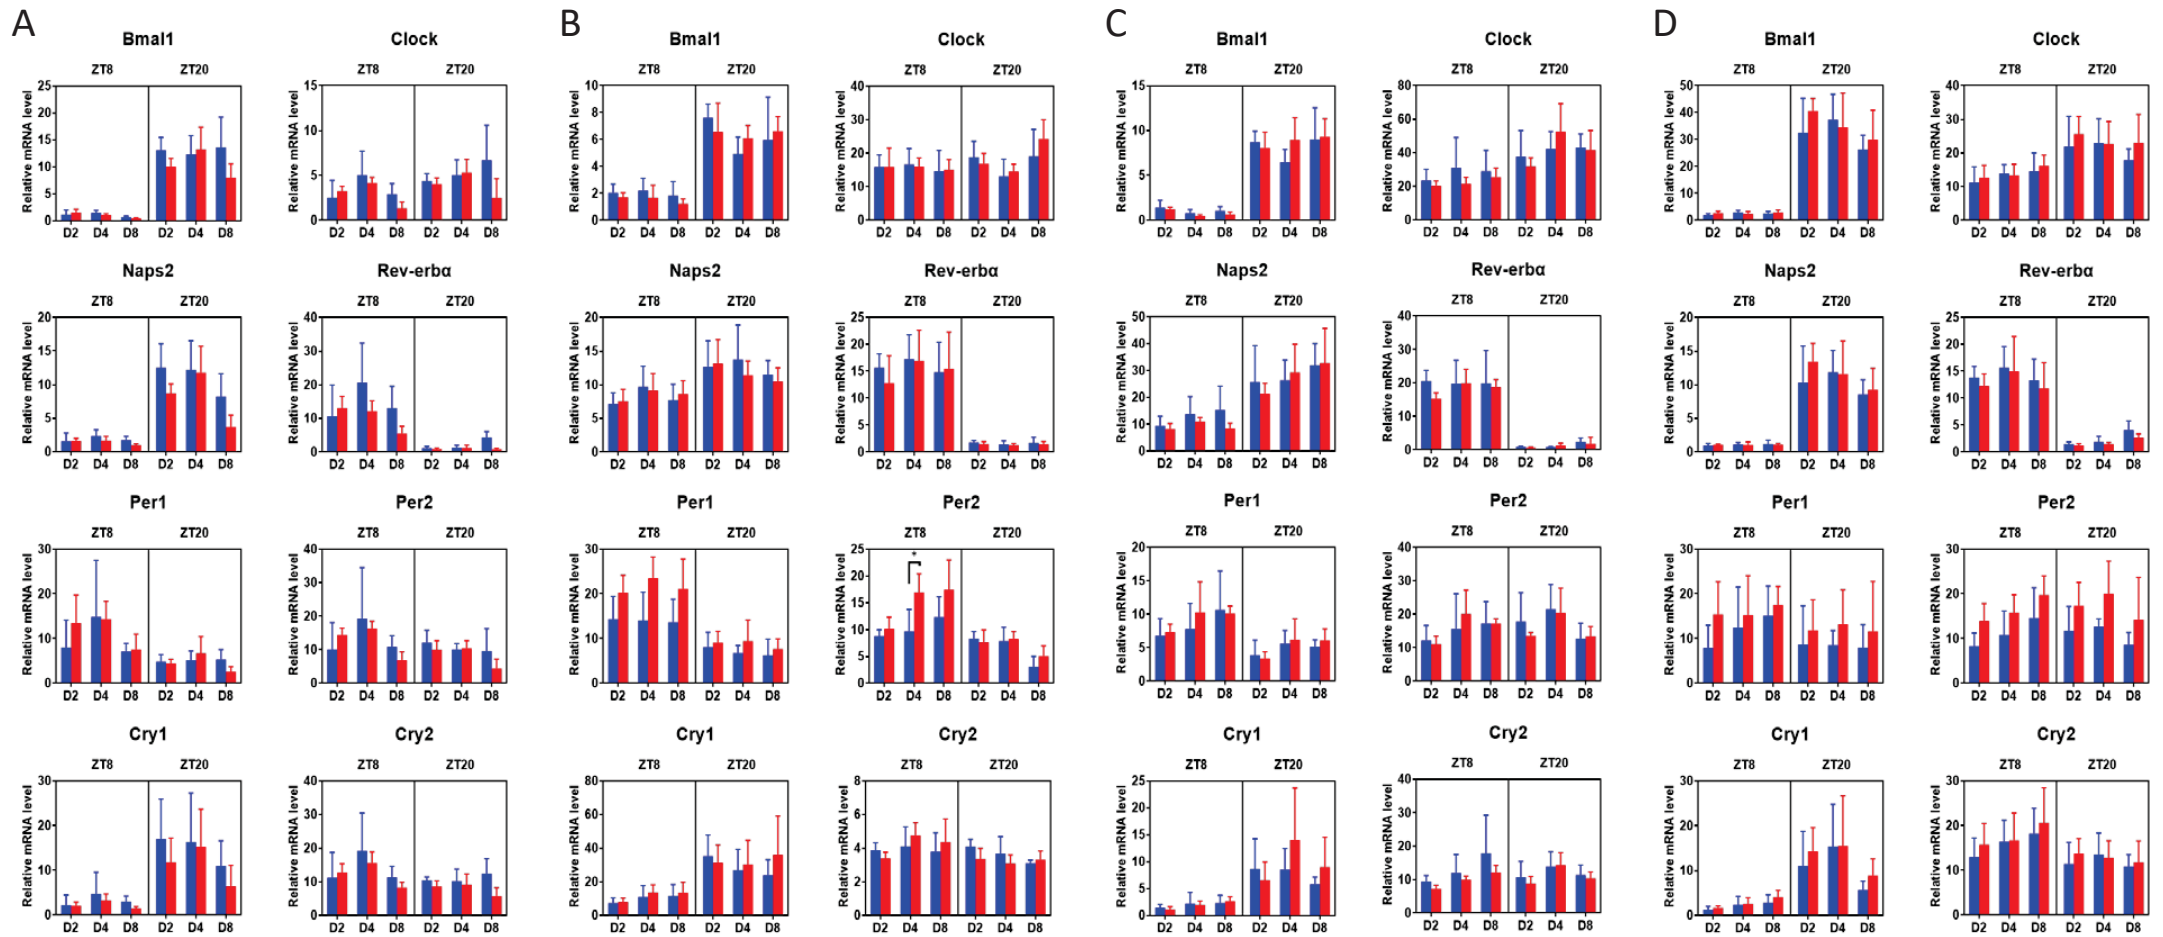

Supplemental Figure I. The effect of ASA-ZT0 and ASA-ZT12 on mRNA levels of core clock genes in the kidney (A), heart (B), aorta (C), and adrenal gland (D) at day 2, day 4, and day 8 after the first dose of aspirin. Tissues were collected at ZT8 or ZT20. qRT-PCR data were normalized to 18s rRNA. Data are depicted as means  $\pm$  SD. Comparisons between ASA-ZT0 (blue) and ASA-ZT12 (red) and between different days were calculated (3-way ANOVA; \*,  $P < 0.05$ ;  $n = 5$ ).
